# Supplementary material for: An autoradiographic evaluation of AV-1451 Tau PET in dementia
Source: Springer Nature journal article supplement (doi:10.1186/s40478-016-0315-6), 2016-06-13
Supplement: 40478_2016_315_MOESM1_ESM.pdf [file 40478_2016_315_MOESM1_ESM.pdf]

| Case ID | ClinicalDx   | PathDx                     | TDP type | Tauopathy | Braak  | Thal | Age | Case ID | Sex | Figure                               |
|---------|--------------|----------------------------|----------|-----------|--------|------|-----|---------|-----|--------------------------------------|
| 1       | Normal       | Normal                     | 0        | --        | 0      | 0    | 81  | 1       | F   | Fig 9 A,B                            |
| 2       | Normal       | Normal                     | 0        | --        | 0      | 0    | 68  | 2       | M   | Fig 2 A-C; Fig 8, A-C; Fig 9 M,N,O,P |
| 3       | Normal       | Normal                     | 0        | --        | 0      | 0    | 65  | 3       | M   | Fig 9 C,D                            |
| 4       | Normal       | PA                         | 0        | 3R+4R     | III    | 3    | 94  | 4       | F   |                                      |
| 5       | MCI          | PA                         | 0        | 3R+4R     | III    | 2    | 88  | 5       | F   | Fig 2 D-F                            |
| 6       | PPA-S        | AD (HpSp)/DLBD             | 0        | 3R+4R     | VI     | 5    | 60  | 6       | M   | Fig 2, G-I; Fig 4 A,B; Fig 9 G,H     |
| 7       | AD           | AD (Typical)/DLBD          | 0        | 3R+4R     | VI     | 5    | 78  | 7       | F   | Fig 3 A-D                            |
| 8       | PSP          | PART/VaD                   | 0        | 3R+4R     | III-IV | 0    | 57  | 8       | F   |                                      |
| 9       | Normal       | PART                       | 0        | 3R+4R     | III-IV | 0    | 89  | 9       | F   |                                      |
| 10      | Normal       | PART                       | 0        | 3R+4R     | IV     | 0    | 82  | 10      | F   | Fig 2 J-L                            |
| 11      | MCI          | NFT dementia               | 0        | 3R+4R     | III    | 0    | 81  | 11      | F   |                                      |
| 12      | AD           | NFT dementia/VaD           | 0        | 3R+4R     | IV     | 0    | 82  | 12      | M   | Fig 2 M-O                            |
| 13      | AD           | NFT dementia/AGD/VaD       | B        | 3R+4R     | III-IV | 0    | 80  | 13      | F   |                                      |
| 14      | PPA-S        | Pick's                     | 0        | 3R        | 0      | 0    | 74  | 14      | M   | Fig 4 C,D                            |
| 15      | AD           | Pick's (lobar atrophy)     | 0        | 3R        | I      | 1    | 70  | 15      | M   | Fig 4 E-H                            |
| 16      | PiD          | Pick's (lobar atrophy)     | 0        | 3R        | 0      | 0    | 72  | 16      | M   | Fig 4 I-L                            |
| 17      | PPA-G        | CBD/PA                     | 0        | 4R        | I-II   | 2    | 67  | 17      | M   | Fig 5 A-D                            |
| 18      | AD           | CBD/AGD                    | 0        | 4R        | II     | 0    | 67  | 18      | M   | Fig 5 E,F                            |
| 19      | PPA-G        | PSP/AGD/SRT/TSA            | 0        | 4R        | II     | 0    | 80  | 19      | M   | Fig 5 I-L; Fig 9 E,F                 |
| 20      | PSP          | PSP                        | 0        | 4R        | II-III | 1    | 68  | 20      | F   | Fig 5 G-H                            |
| 21      | PSP          | PSP                        | 0        | 4R        | I      | 0    | 65  | 21      | M   |                                      |
| 22      | MCI          | AGD                        | 0        | 4R        | III    | 0    | 90  | 22      | M   | Fig 5 M,N                            |
| 23      | Normal       | AGD                        | 0        | 4R        | III    | 1    | 91  | 23      | M   | Fig 5 O-P                            |
| 24      | PPND         | FTDP-17 (PPND; MAPT N279K) | 0        | 4R        | 0      | 0    | 49  | 24      | M   | Fig 6 A-F                            |
| 25      | PPND         | FTDP-17 (PPND; MAPT N279K) | 0        | 4R        | 0      | 0    | 50  | 25      | F   | Fig 6 G,H                            |
| 26      | FTD          | FTDP-17 (MAPT P301L)       | 0        | 4R        | 0      | 0    | 53  | 26      | M   | Fig 6 K-N                            |
| 27      | FTD, familia | FTDP-17 (MAPT P301L)       | 0        | 4R        | I-II   | 0    | 52  | 27      | M   | Fig 6 O,P                            |
| 28      | FTD          | FTDP-17 (MAPT R406W)       | --       | 3R+4R     | 5      | 0    | 66  | 28      | F   | Fig 6 Q-T                            |
| 29      | PPA-S        | AD (Typical v HpSp)/CAA    | 0        | 3R+4R     | VI     | 5    | 77  | 29      | M   | Fig 7 A-C                            |
| 30      | PNFA         | FTLD-U/HpScI (GRN)         | A        | --        | 0      | 0    | 64  | 30      | M   | Fig 7 D-H; Fig 8 D-I; Fig 9 K,L      |
| 31      | FTD          | FTLD-U/HpScI/NII (GRN)     | A        | --        | 0      | 0    | 63  | 31      | M   | Fig 7 G-I; Fig 9 Q-T                 |
| 32      | PPA-S        | FTLD-U                     | C        | --        | 0      | 1    | 75  | 32      | M   | Fig 7 J-L                            |
| 33      | PNFA         | FTLD-U                     | C        | --        | I      | 1    | 65  | 33      | M   |                                      |
| 34      | DLB          | DLBD                       | 0        | --        | 0      | 0    | 60  | 34      | M   |                                      |
| 35      | AD v DLB     | DLBD                       | 0        | --        | II-III | 1    | 76  | 35      | M   |                                      |
| 36      | MSA          | MSA (SND & OPCA)/SC        | 0        | --        | 0      | 1    | 58  | 36      | F   | Fig 9 I,J                            |
| 37      | CBD          | NBIA (PSD)/NFT/LBD         | 0        | 3R+4R     | V      | 0    | 51  | 37      | M   |                                      |
| 38      | VaD          | Siderosis                  | 0        | --        | 0      | 0    | 59  | 38      | F   |                                      |

| Case ID | ARG score region 1    | ARG score region 2        | ARG score region 3        | ARG score region 4   | ARG score region 6   |
|---------|-----------------------|---------------------------|---------------------------|----------------------|----------------------|
| 1       | Hippocampus; absent   | Midbrain; absent          |                           |                      |                      |
| 2       | Hippocampus; absent   |                           |                           |                      |                      |
| 3       | Amygdala; absent      | Hippocampus; absent       | Midbrain; absent          |                      |                      |
| 4       | Hippocampus; moderate |                           |                           |                      |                      |
| 5       | Hippocampus; minimal  |                           |                           |                      |                      |
| 6       | Amygdala; moderate    | Temporal; strong          | Hippocampus; strong       |                      |                      |
| 7       | Amygdala; moderate    | Parietal; strong          | Visual; strong            | Hippocampus; strong  | Midbrain; absent     |
| 8       | Hippocampus; moderate |                           |                           |                      |                      |
| 9       | Hippocampus; minimal  |                           |                           |                      |                      |
| 10      | Hippocampus; moderate |                           |                           |                      |                      |
| 11      | Hippocampus; strong   |                           |                           |                      |                      |
| 12      | Hippocampus; moderate |                           |                           |                      |                      |
| 13      | Hippocampus; absent   |                           |                           |                      |                      |
| 14      | Amygdala; minimal     | Temporal; minimal         | Frontal; absent           |                      |                      |
| 15      | Frontal; minimal      | Parietal; minimal         |                           |                      |                      |
| 16      | Amygdala; absent      | Temporal; minimal         | Frontal; minimal-moderate | Parietal; minimal    |                      |
| 17      | Amygdala; minimal     | Frontal; minimal-moderate | Motor; absent             | Midbrain; absent     | Subthalamic; minimal |
| 18      | Amygdala; absent      | Frontal; minimal          | Motor; minimal            | Midbrain; absent     | Subthalamic; minimal |
| 19      | Amygdala; absent      | Frontal; minimal          | Motor; absent             | Midbrain; minimal    | Subthalamic; minimal |
| 20      | Frontal; absent       | Motor; minimal            | Midbrain; minimal         | Subthalamic; minimal |                      |
| 21      | Frontal; minimal      | Motor; absent             | Subthalamic; minimal      |                      |                      |
| 22      | Hippocampus; absent   |                           |                           |                      |                      |
| 23      | Hippocampus; absent   |                           |                           |                      |                      |
| 24      | Amygdala; absent      | Temporal; minimal         | Frontal; minimal          | Midbrain; absent     |                      |
| 25      | Amygdala; minimal     | Temporal; absent          | Frontal; absent           | Midbrain; absent     |                      |
| 26      | Amygdala; absent      | Temporal; minimal         | Frontal; minimal          | Midbrain; absent     |                      |
| 27      | Amygdala; minimal     | Temporal; minimal         | Frontal; minimal          | Midbrain; absent     |                      |
| 28      | Hippocampus; strong   | Temporal; strong          |                           |                      |                      |
| 29      | Amygdala; strong      | Temporal; strong          | Frontal; strong           | Parietal; strong     | Visual; moderate     |
| 30      | Amygdala; absent      | Temporal; minimal         | Frontal; minimal          | Hippocampus; minimal |                      |
| 31      | Amygdala; minimal     | Temporal; minimal         | Frontal; minimal          |                      |                      |
| 32      | Amygdala; minimal     | Temporal; minimal         | Frontal; minimal          |                      |                      |
| 33      | Amygdala; absent      | Frontal; minimal          |                           |                      |                      |
| 34      | Frontal; absent       | Midbrain; absent          |                           |                      |                      |
| 35      | Amygdala; absent      | Midbrain; absent          |                           |                      |                      |
| 36      | Midbrain; strong      | Pituitary; moderate       |                           |                      |                      |
| 37      | Hippocampus; absent   |                           |                           |                      |                      |
| 38      | Frontal; absent       |                           |                           |                      |                      |

| Case ID | ARG off target scores                                 |
|---------|-------------------------------------------------------|
| 1       | substantia nigra; strong                              |
| 2       | lateral geniculate: minimal                           |
| 3       | substantia nigra; strong; lateral geniculate: minimal |
| 4       | lateral geniculate: minimal                           |
| 5       | lateral geniculate: minimal                           |
| 6       | ependymal                                             |
| 7       | substantia nigra; strong; lateral geniculate: minimal |
| 8       |                                                       |
| 9       | strong; lateral geniculate: minimal                   |
| 10      | lateral geniculate: minimal                           |
| 11      | lateral geniculate: minimal                           |
| 12      | ependymal strong; lateral geniculate: minimal         |
| 13      | ependymal strong; lateral geniculate: minimal         |
| 14      | basal ganglia, vessels                                |
| 15      |                                                       |
| 16      |                                                       |
| 17      | substantia nigra; strong                              |
| 18      | substantia nigra; strong                              |
| 19      | ependymal and substantia nigra; strong                |
| 20      | substantia nigra; strong                              |
| 21      |                                                       |
| 22      | vessels                                               |
| 23      |                                                       |
| 24      | ependymal and substantia nigra; strong                |
| 25      | ependymal and substantia nigra; strong                |
| 26      | ependymal and substantia nigra; strong                |
| 27      | ependymal and substantia nigra; strong                |
| 28      |                                                       |
| 29      | basal ganglia, vessels                                |
| 30      |                                                       |
| 31      | basal ganglia, vessels                                |
| 32      |                                                       |
| 33      | basal ganglia, ependymal                              |
| 34      | substantia nigra; strong                              |
| 35      | substantia nigra; strong                              |
| 36      | ependymal in pituitary; substantia nigra strong       |
| 37      | nucleus basalis: strong                               |
| 38      | vessels                                               |

**Information:**

**Title: An Autoradiographic Evaluation of AV-1451 Tau PET in Dementia**

**Journal: Acta Neuropathologica**

**Author: Val J. Lowe, MD**

Department of Radiology, CH 1-285

Mayo Clinic

200 First Street SW

Rochester, MN 55905 USA

Telephone 507 284-4104

Email: [vlowe@mayo.edu](mailto:vlowe@mayo.edu)
